# Supplementary figures and images for: Key Regulators of Sucrose Metabolism Identified through Comprehensive Comparative Transcriptome Analysis in Peanuts
Source: MDPI journal article supplement (doi:10.3390/ijms22147266), 2021-07-06

S1

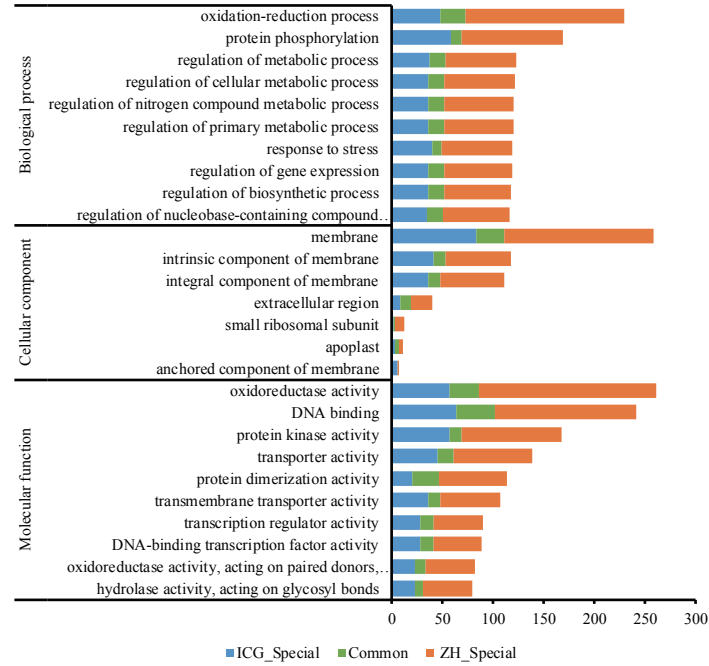

S2

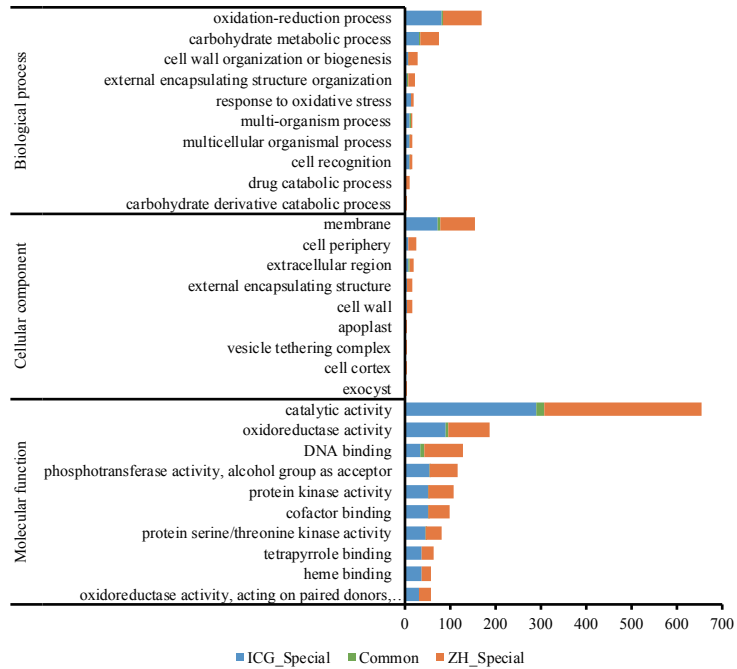

S3

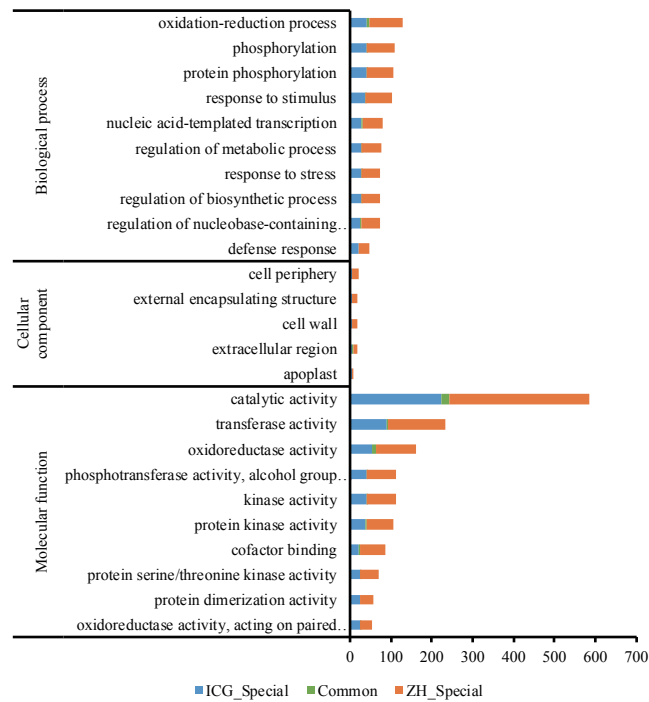

S4

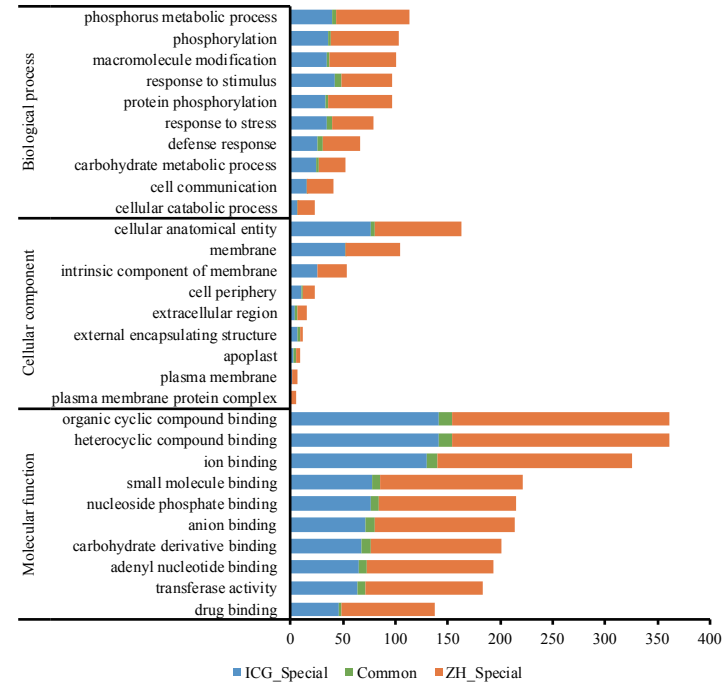

S5

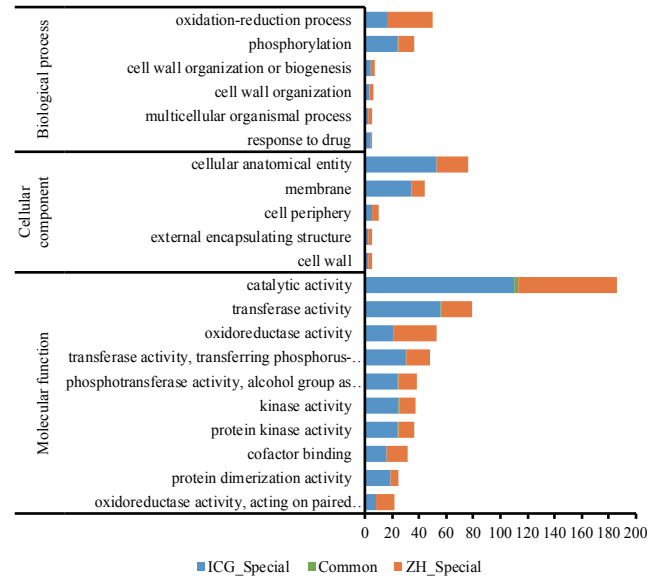

S6

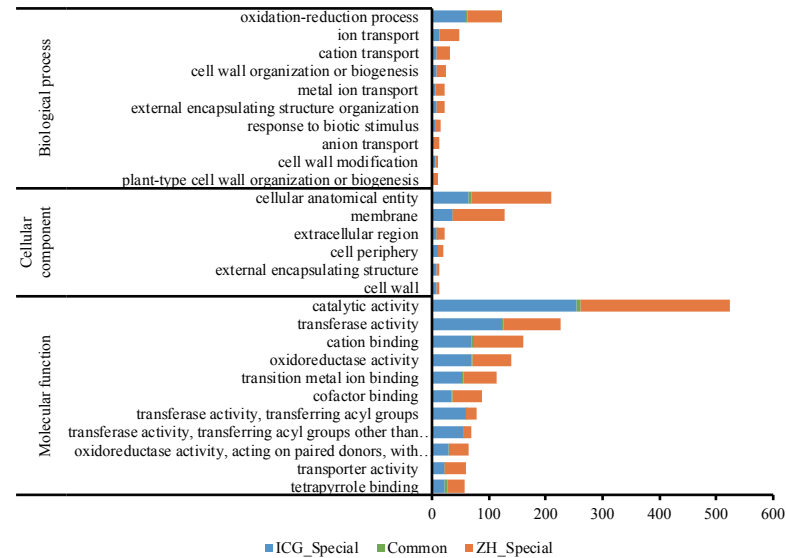

S7

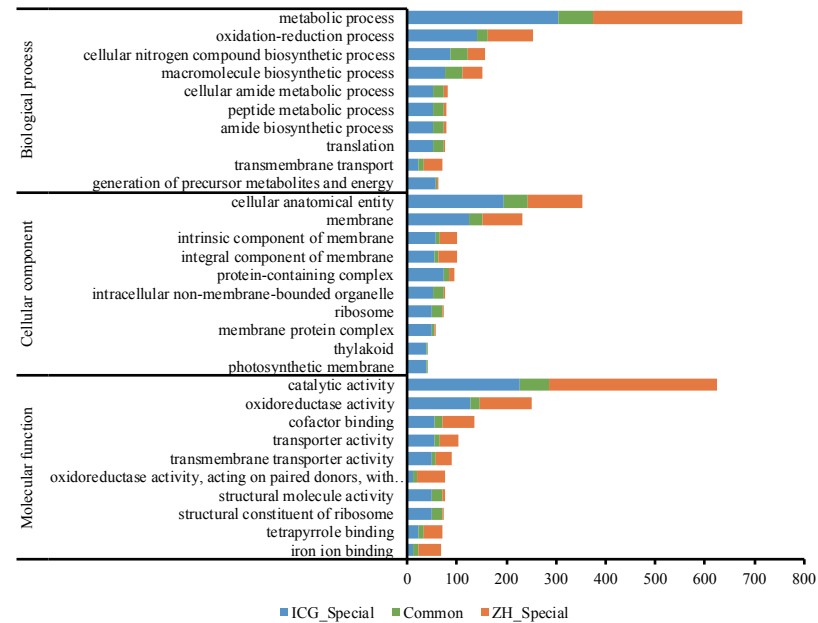

Supplement: s1 [file s1]

A

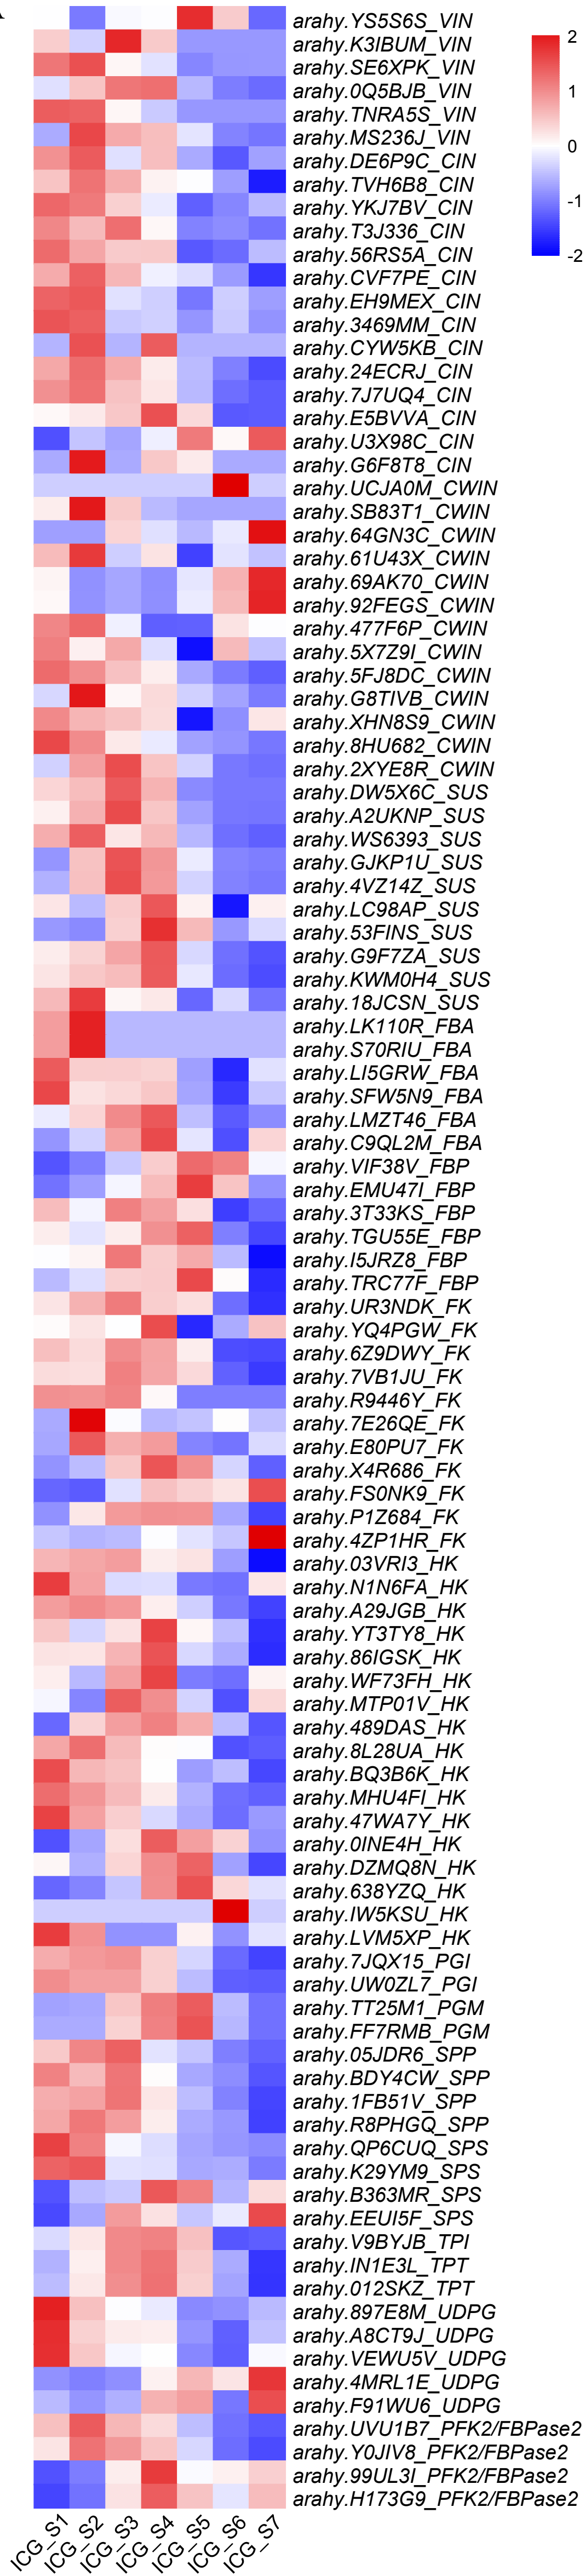

B

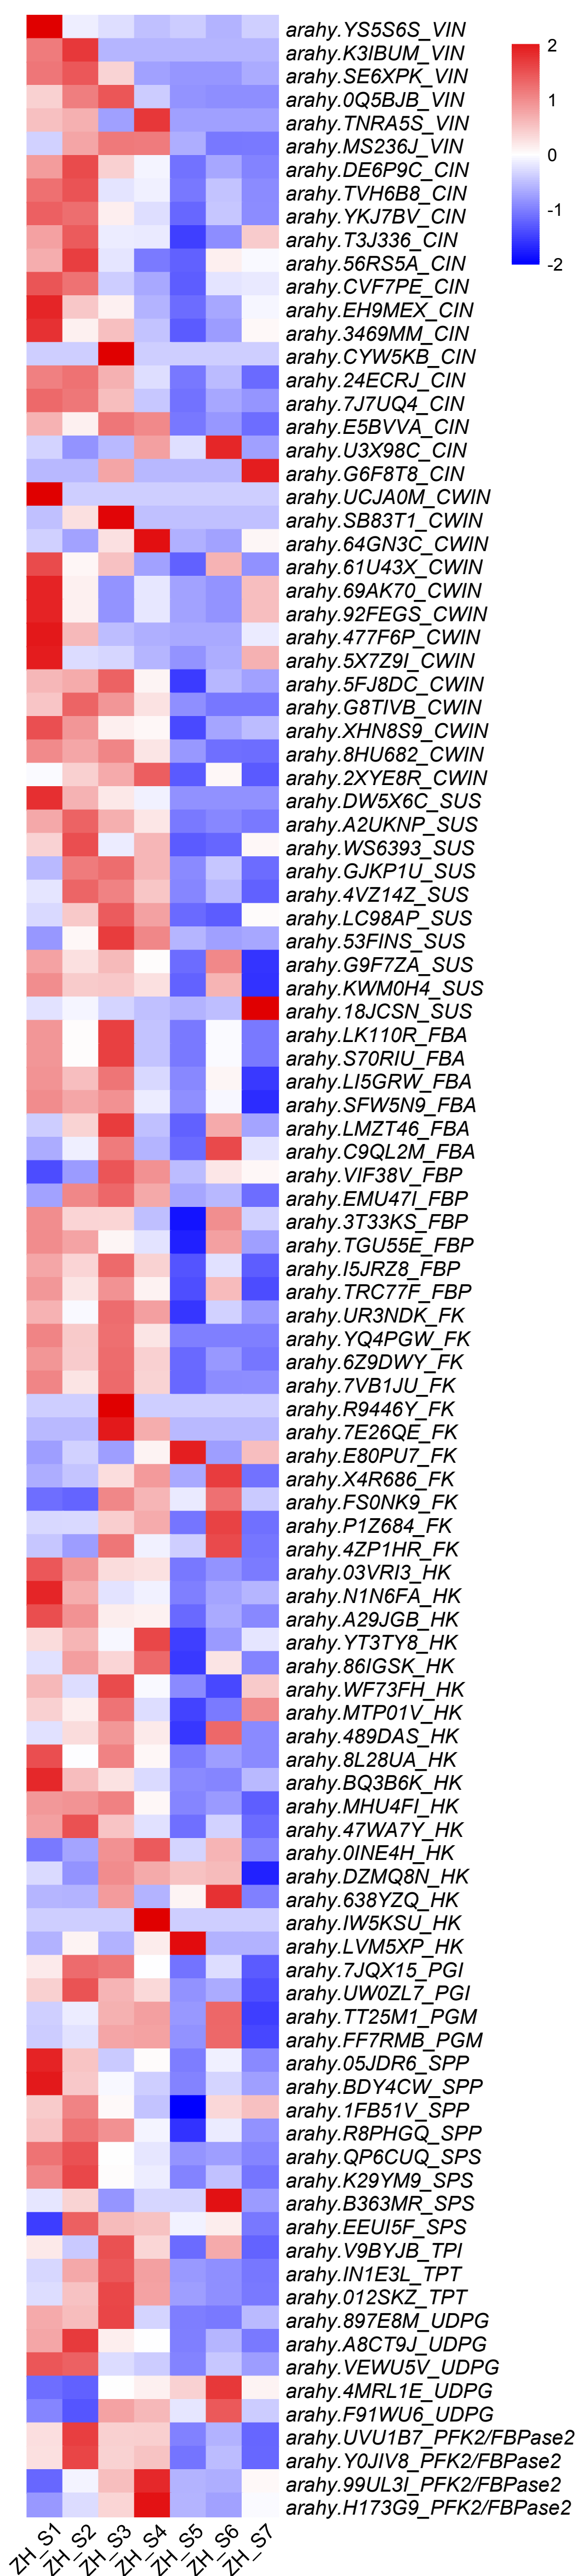

C

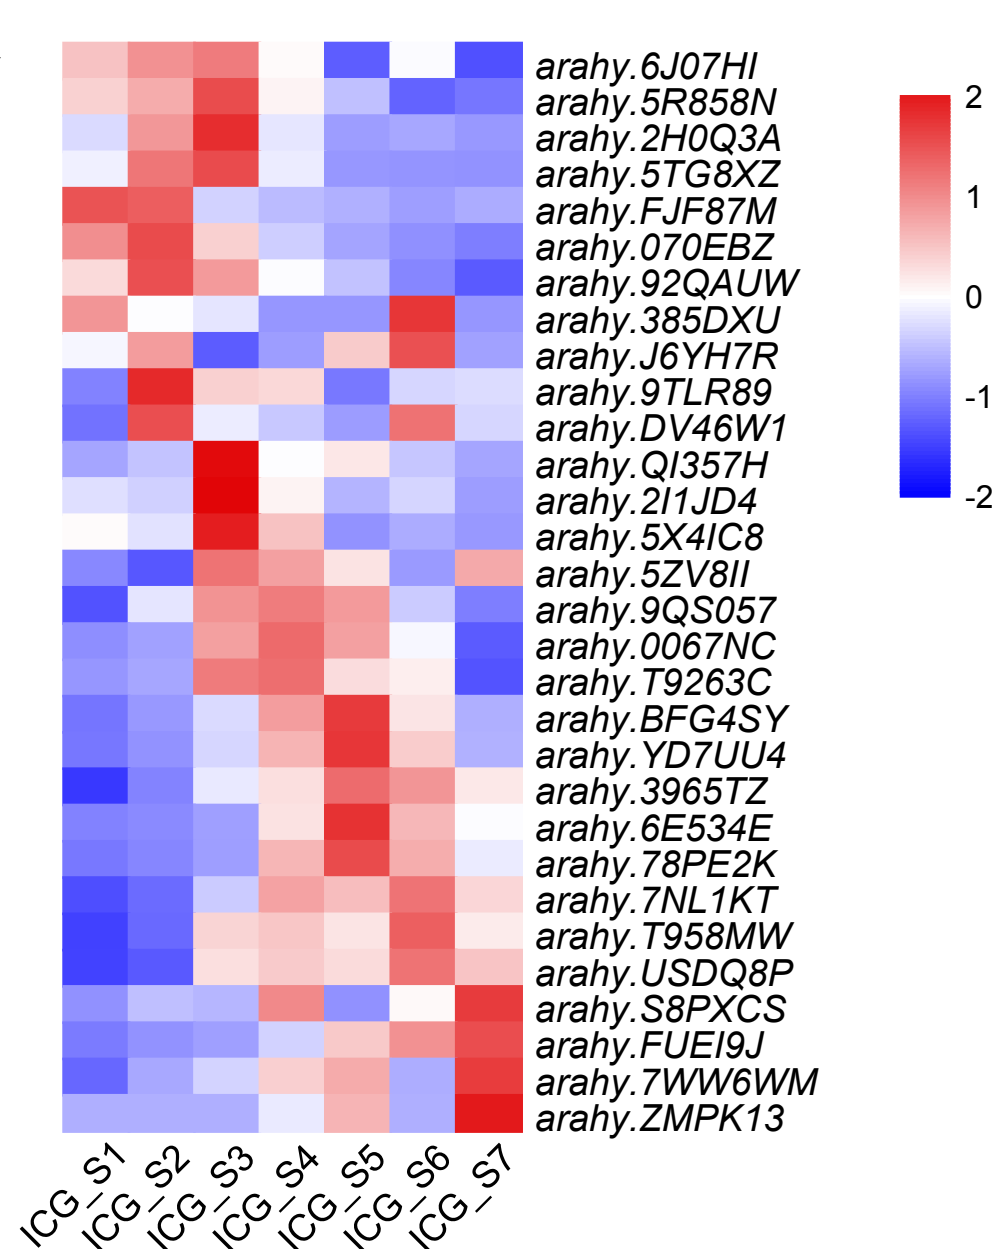

D

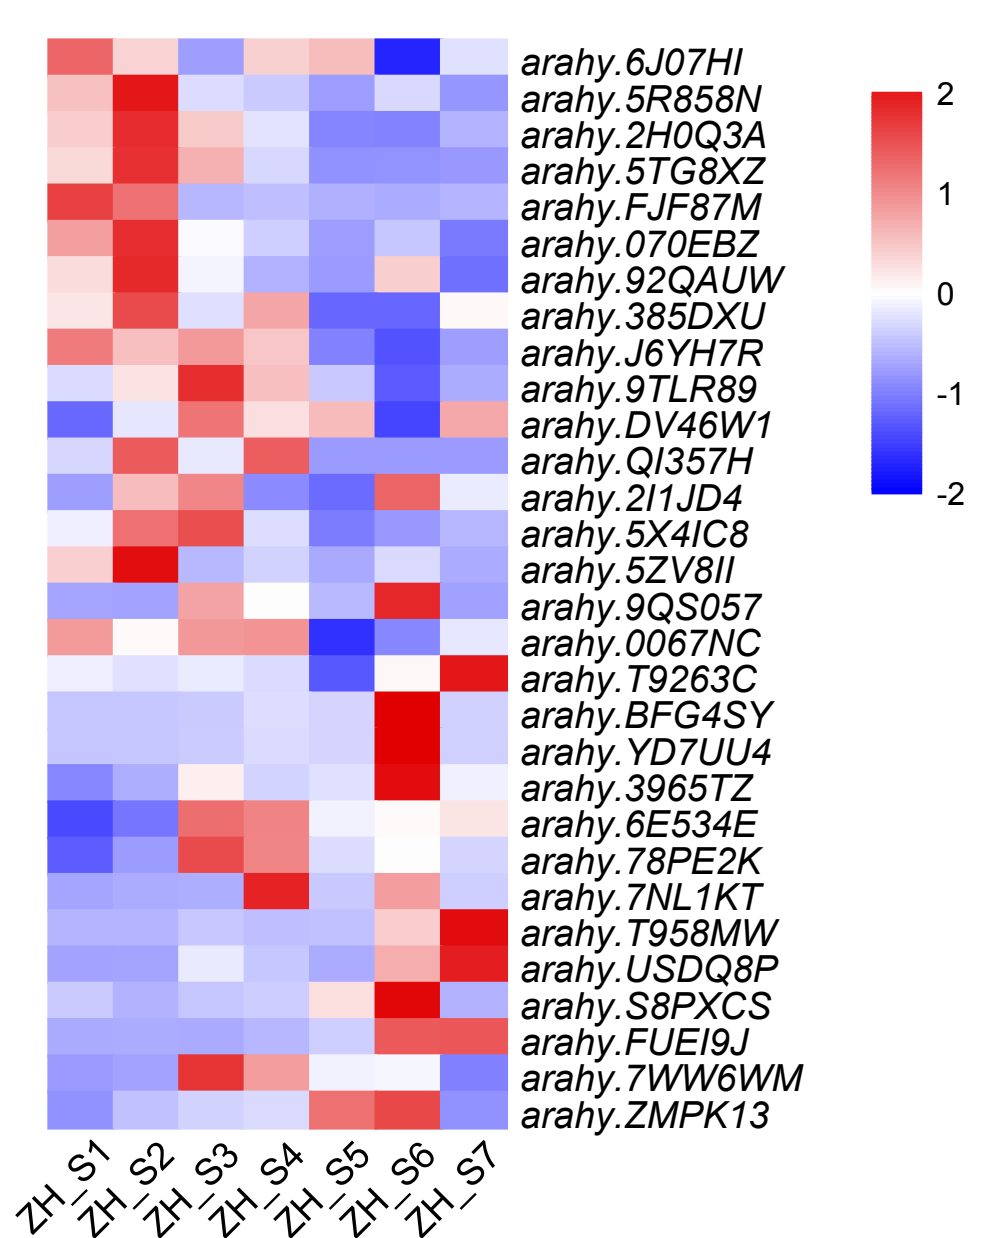

Supplement: s1 [file s1]

# PCA

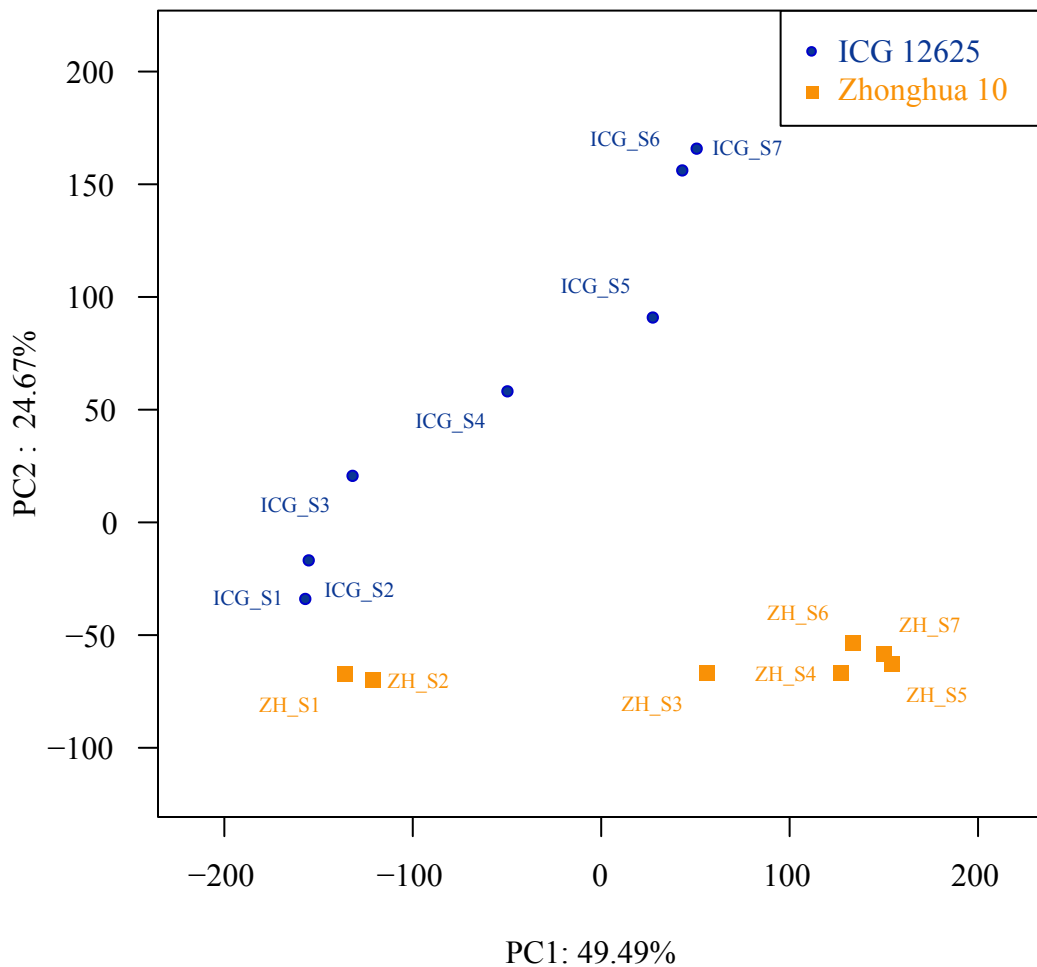

Supplement: s1 [file s1]

A

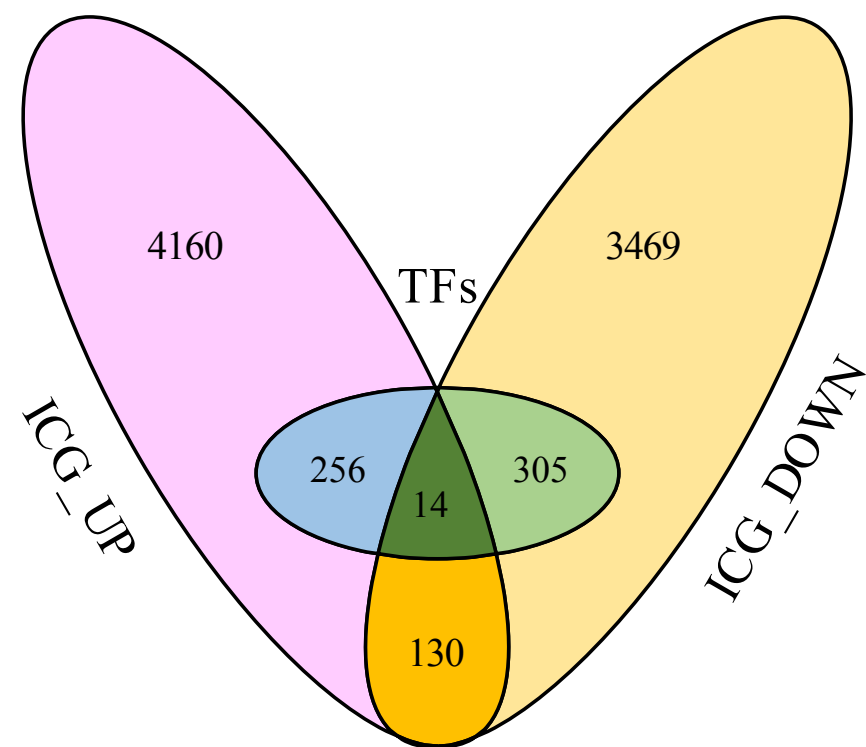

B

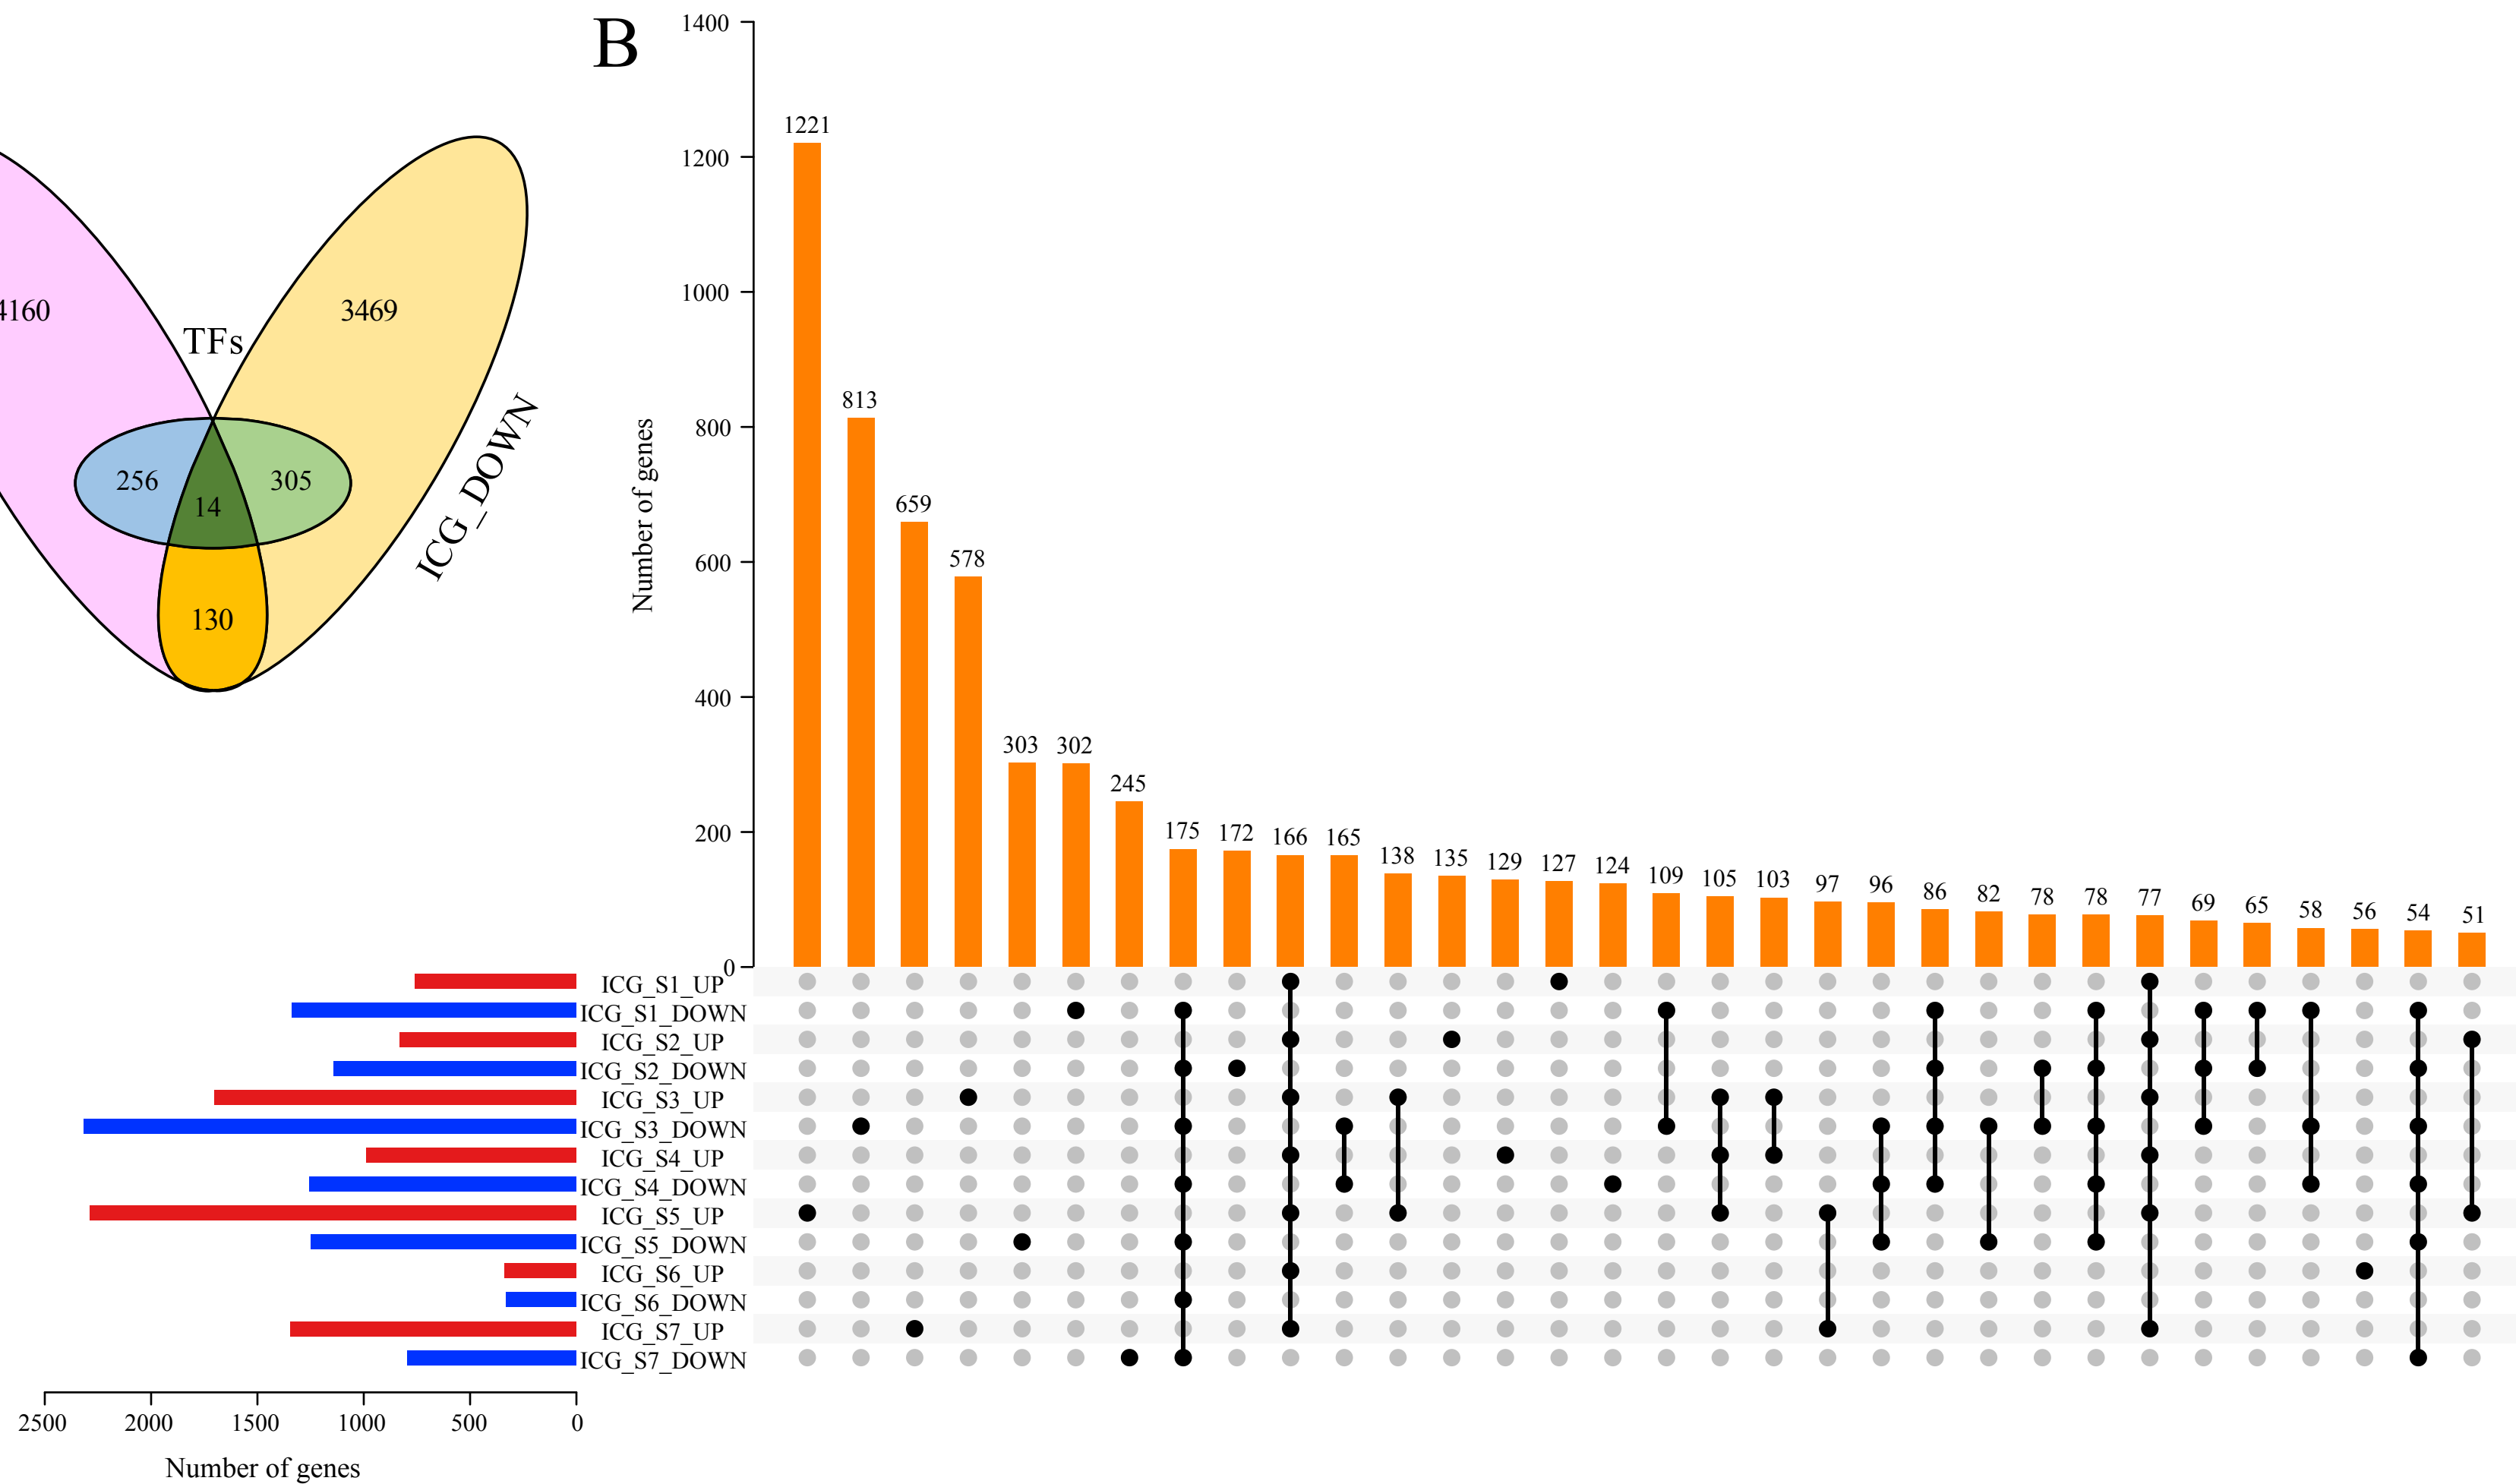

Supplement: s1 [file s1]

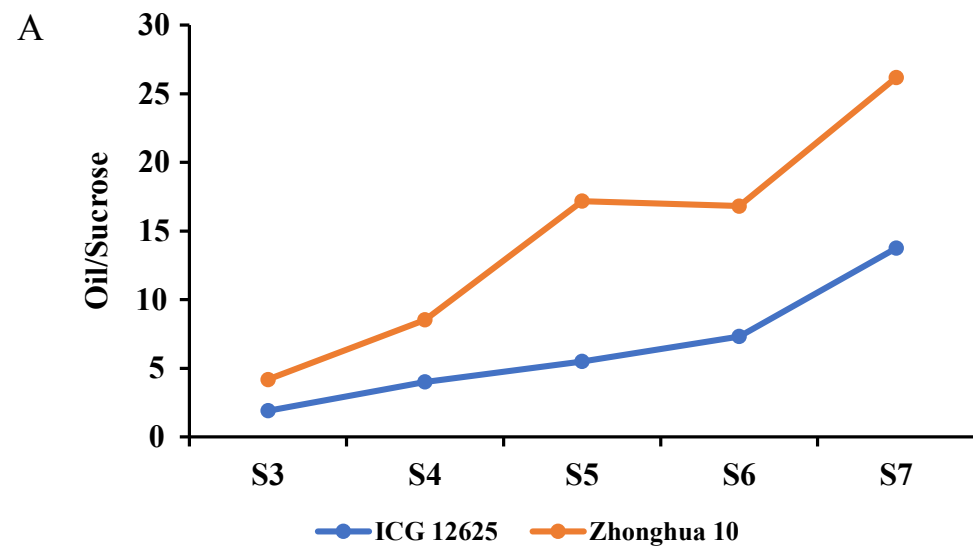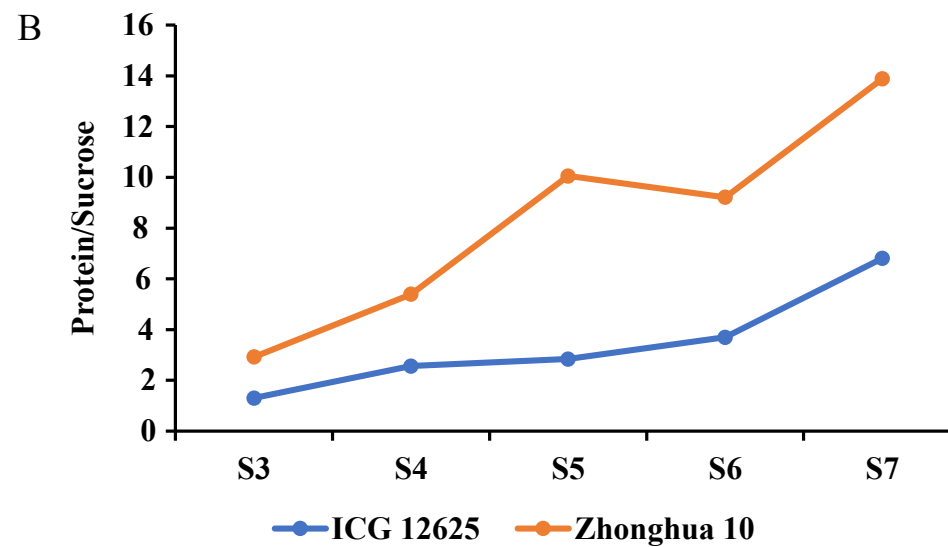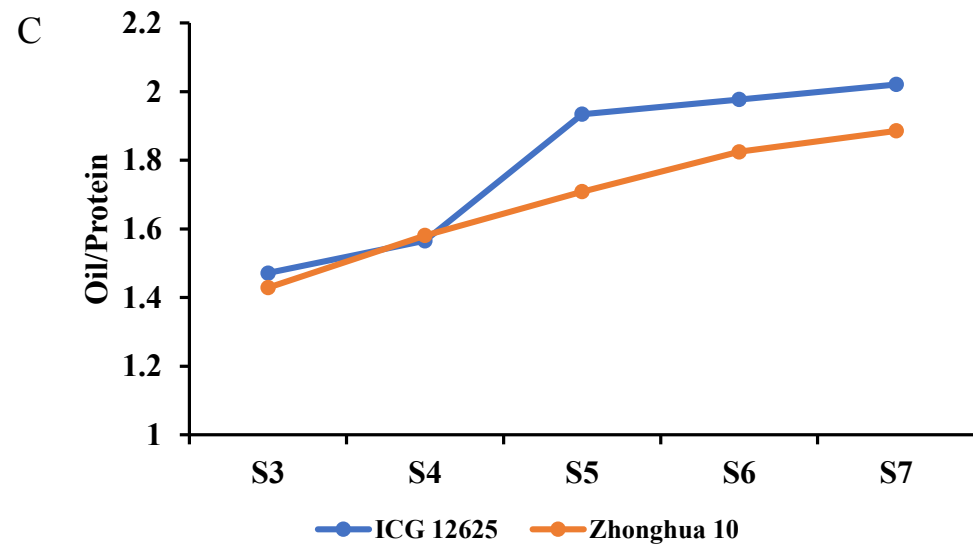

Supplement: s1 [file s1]

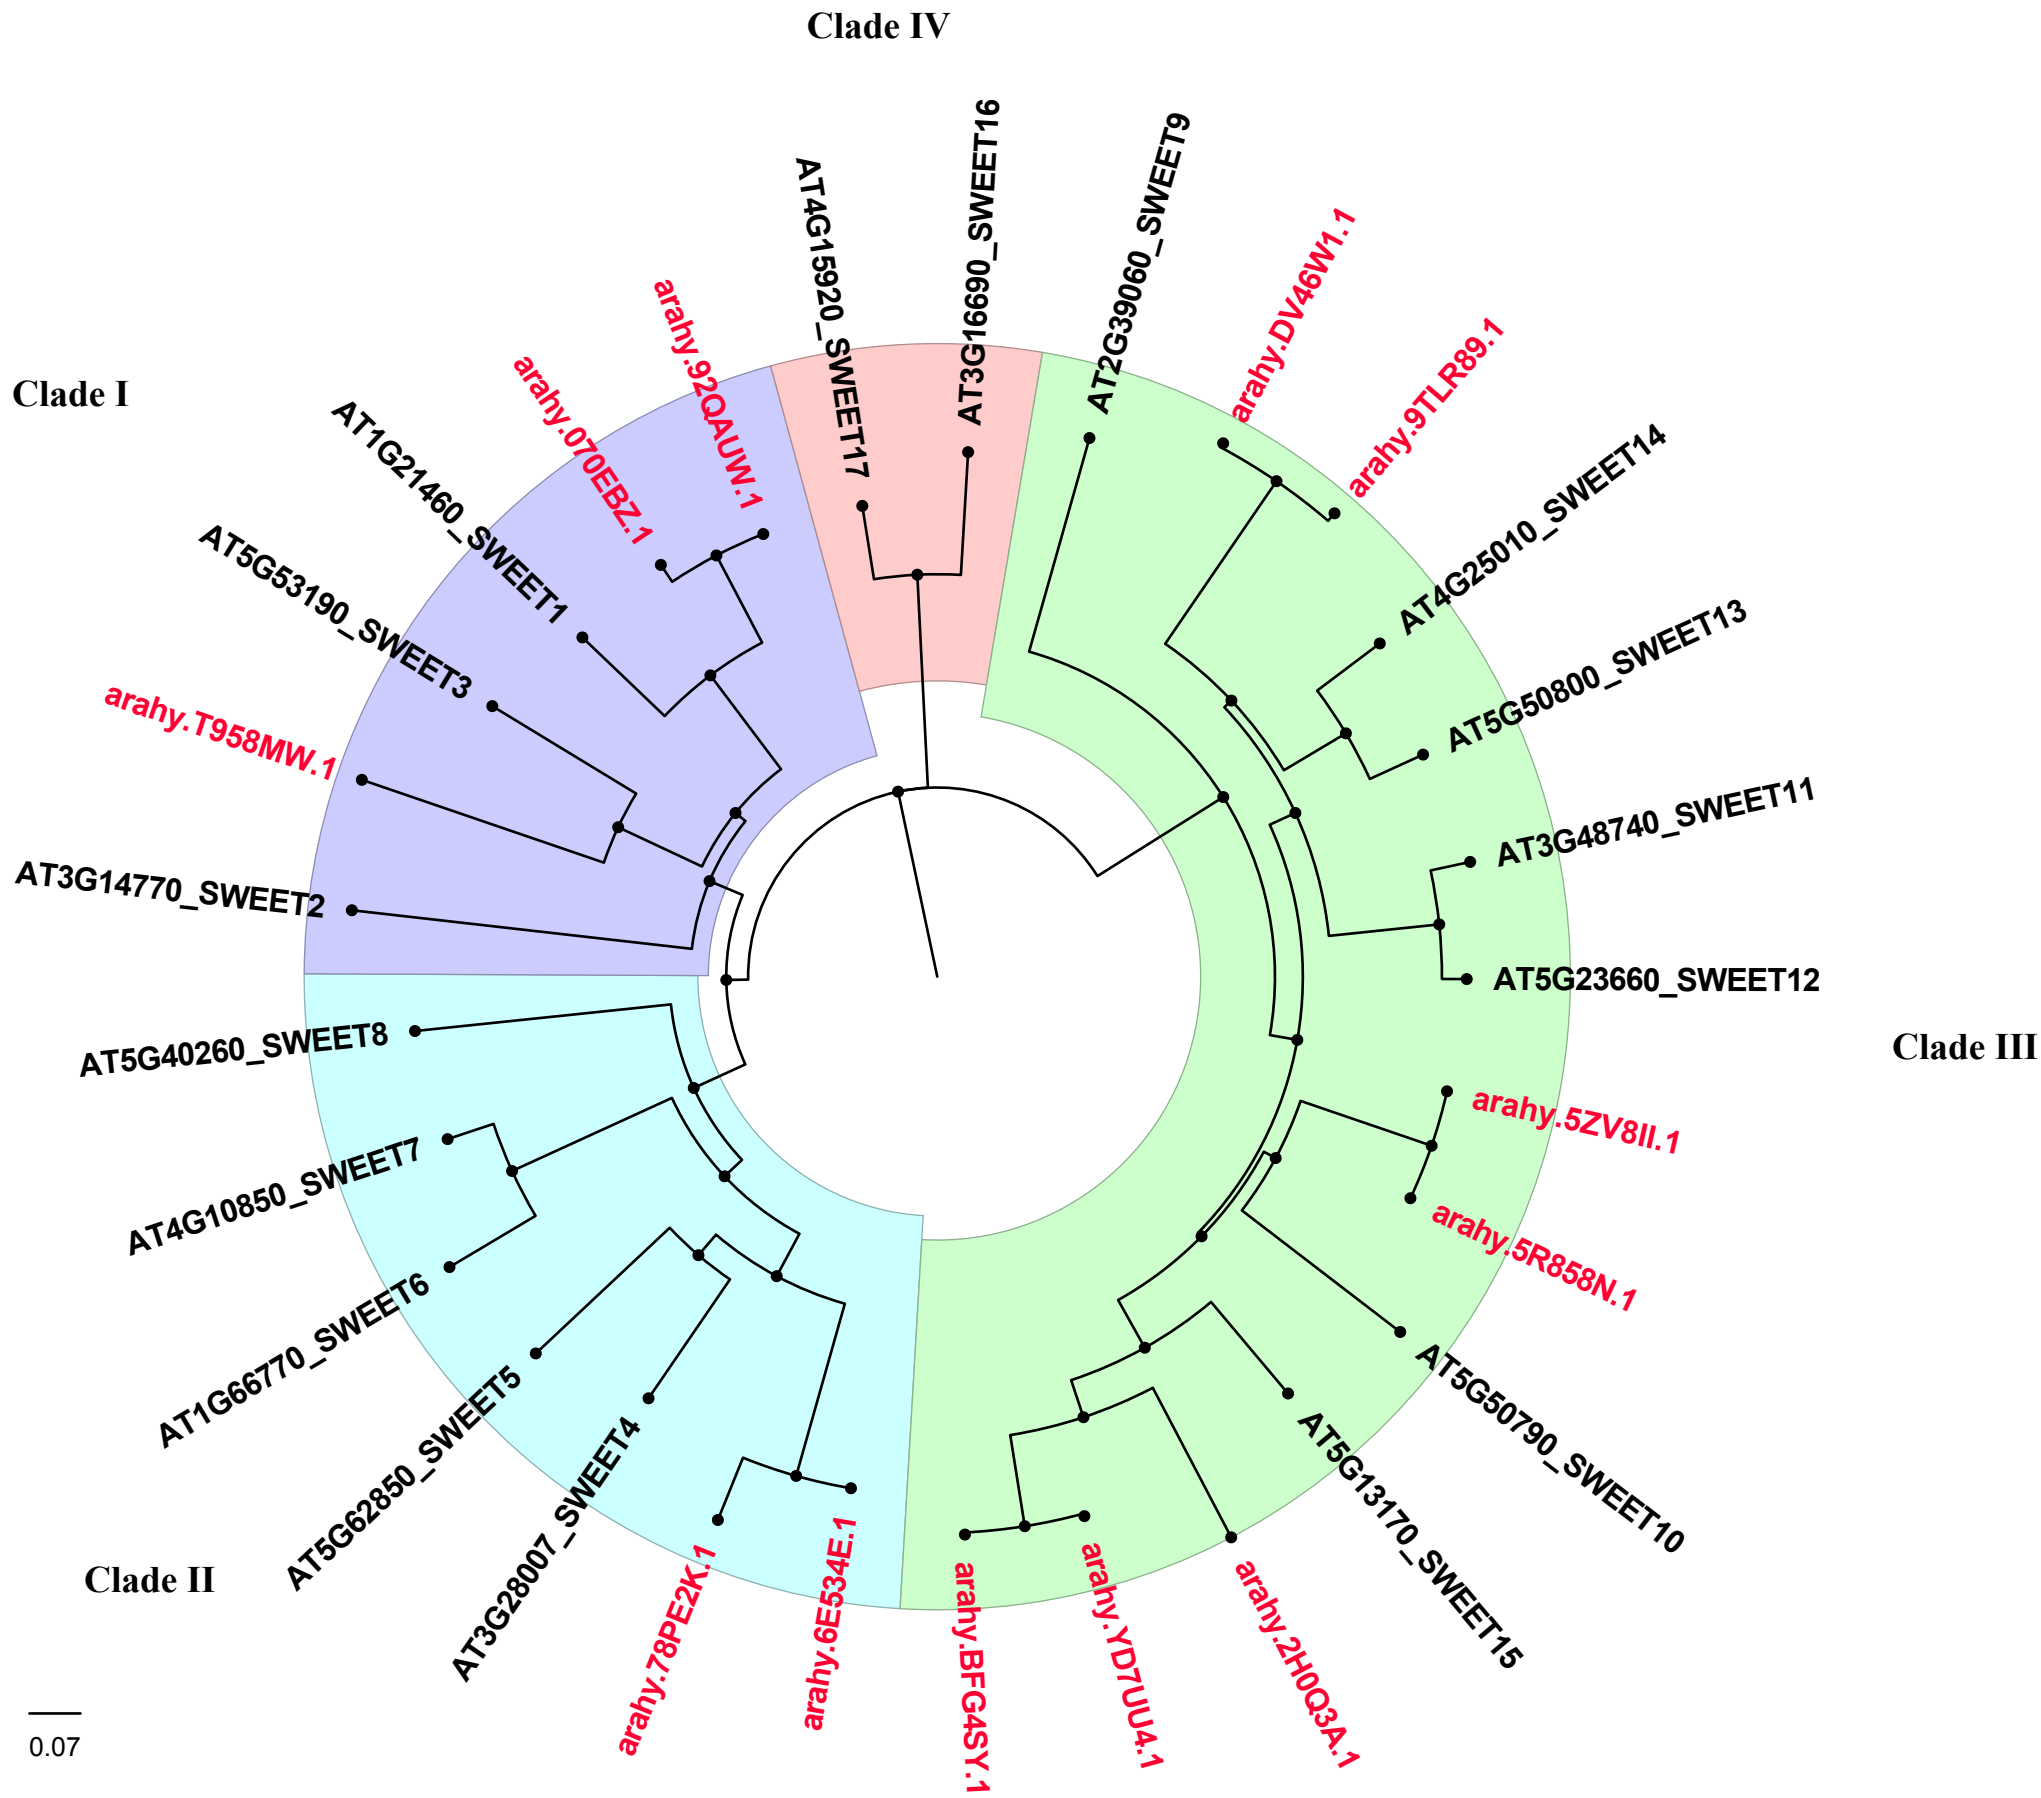

Supplement: s1 [file s1]

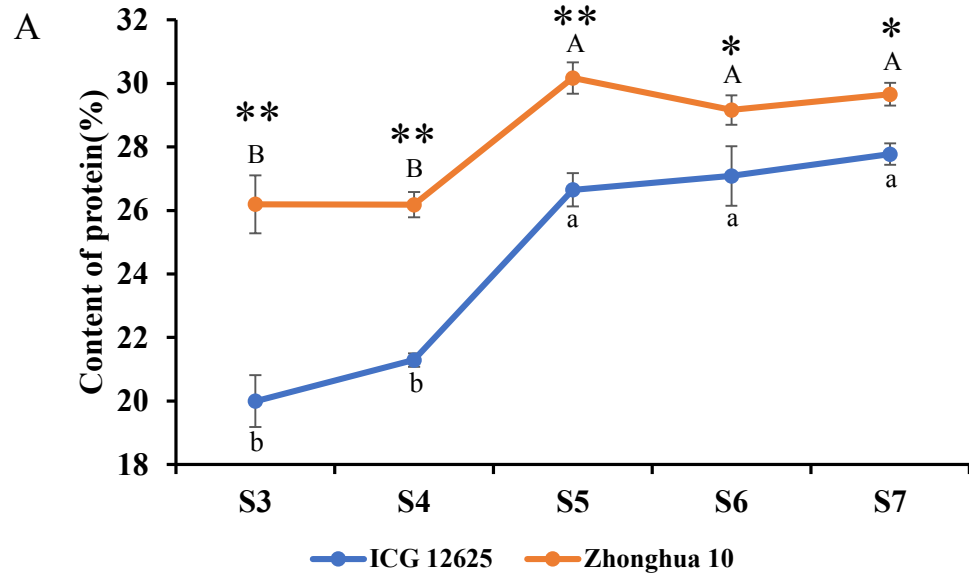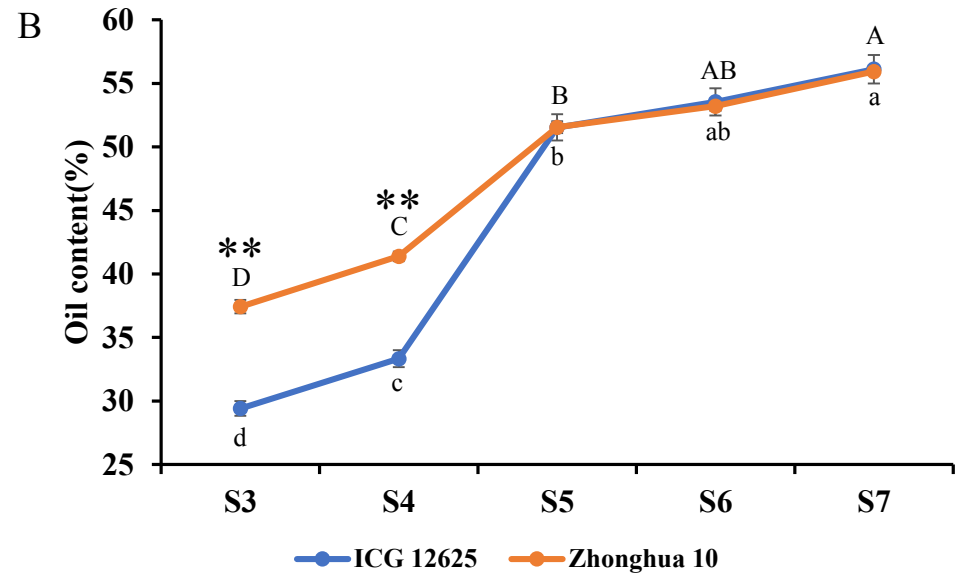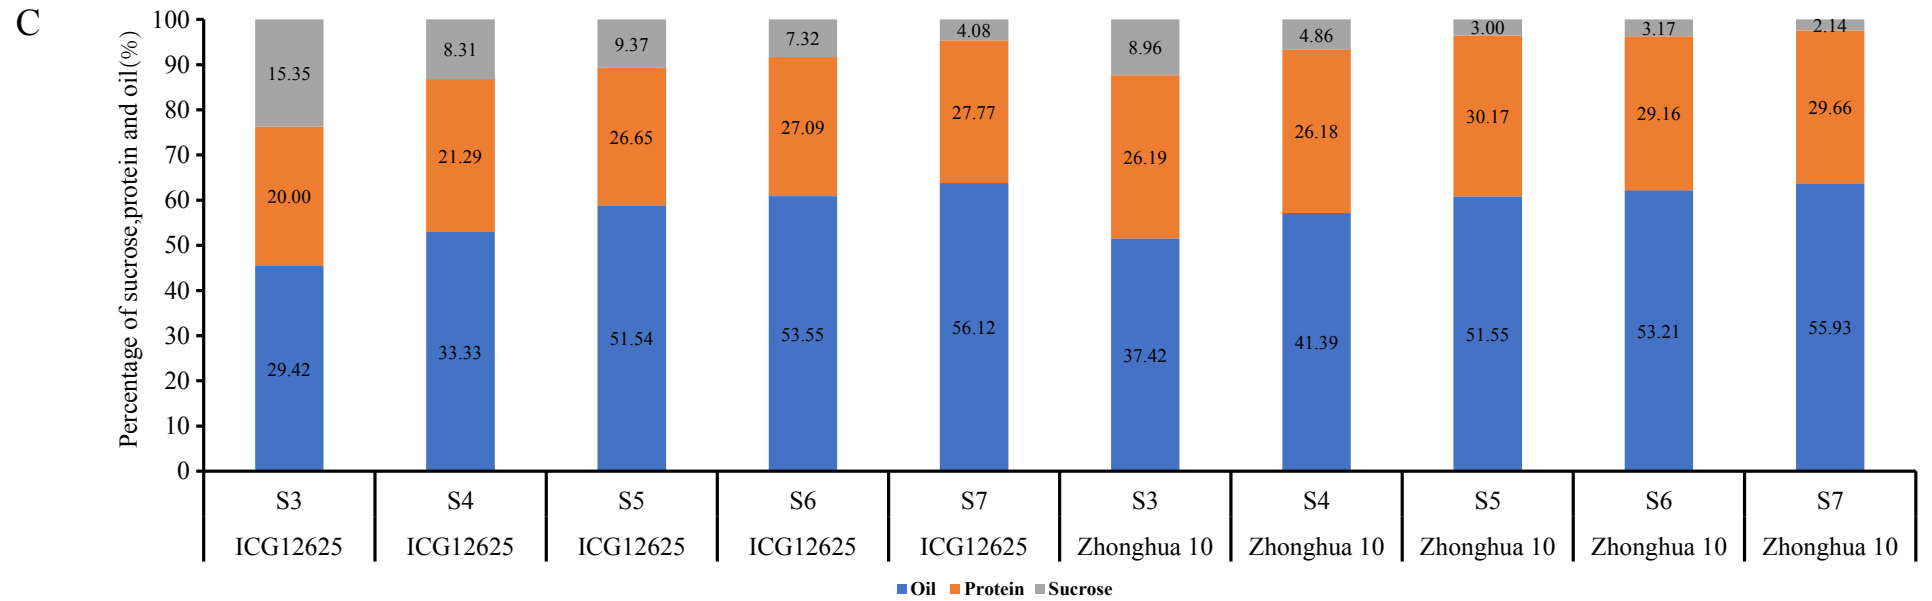

Supplement: s1 [file s1]

A

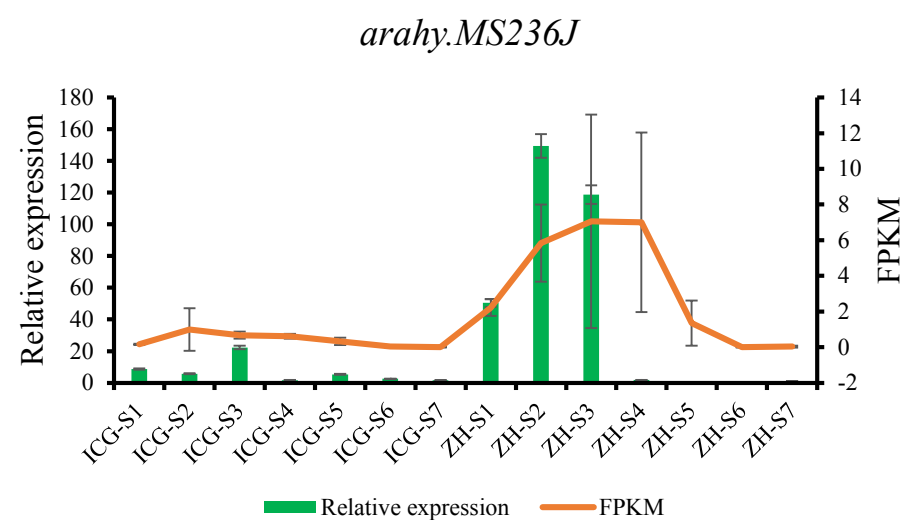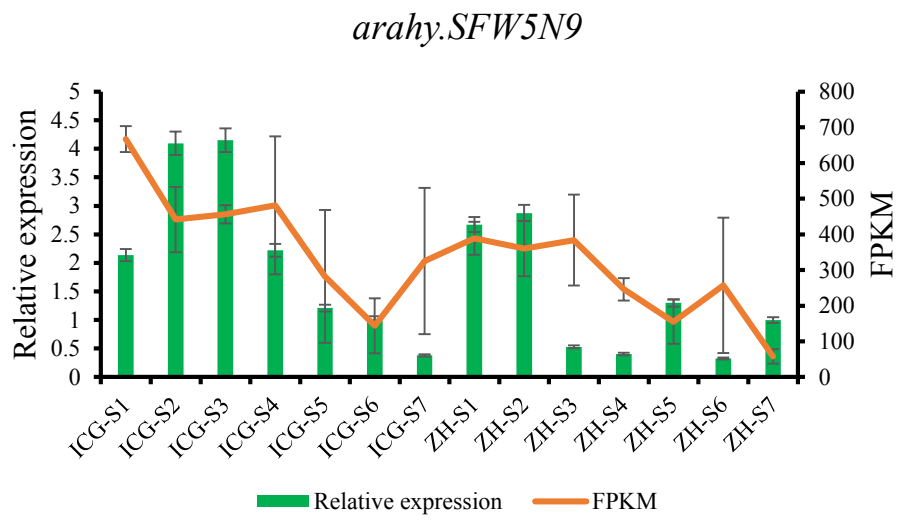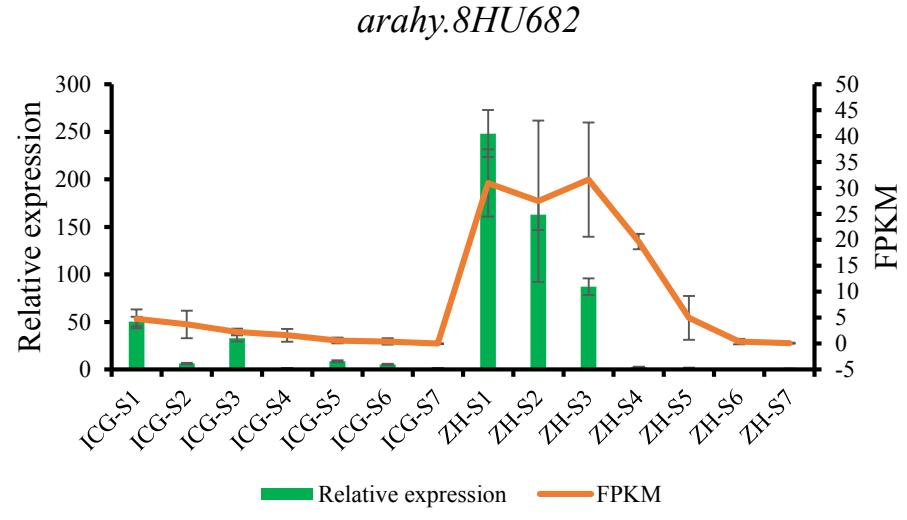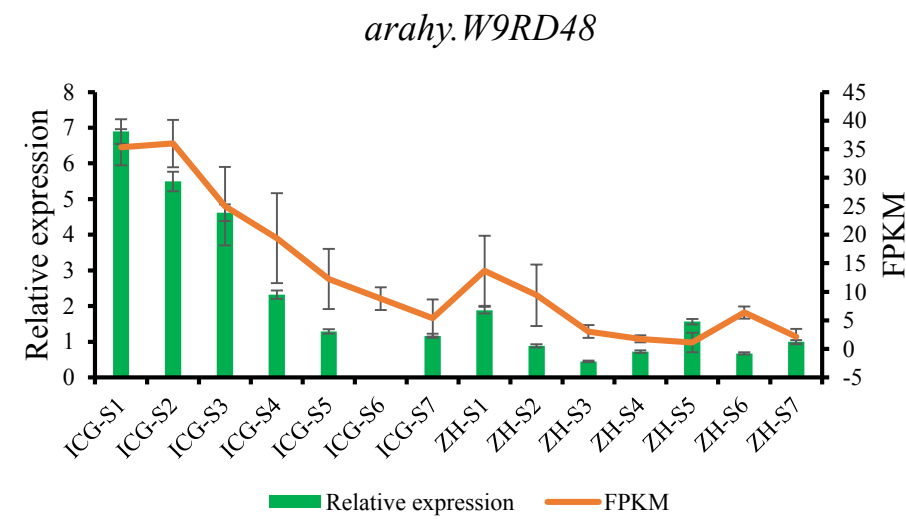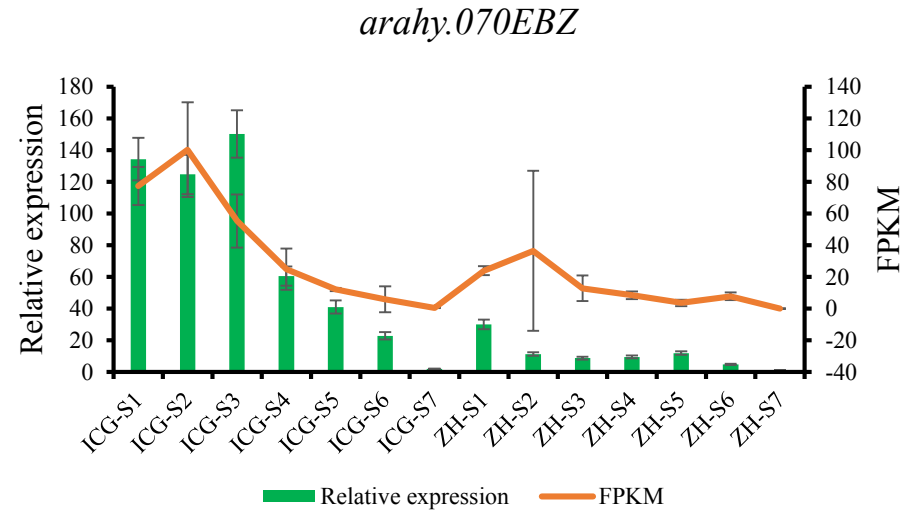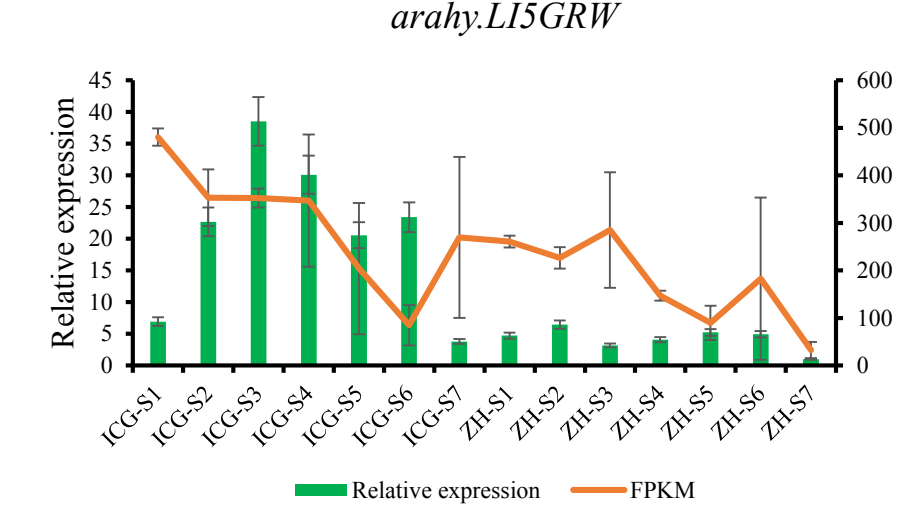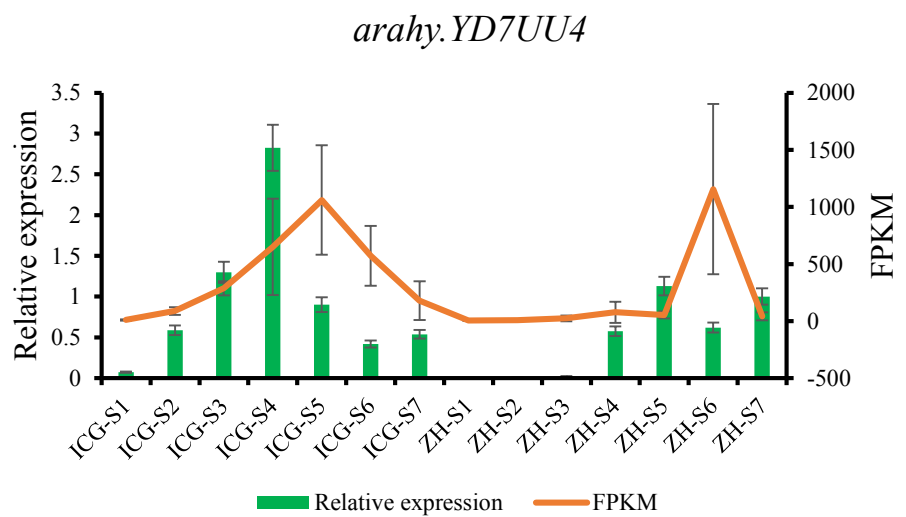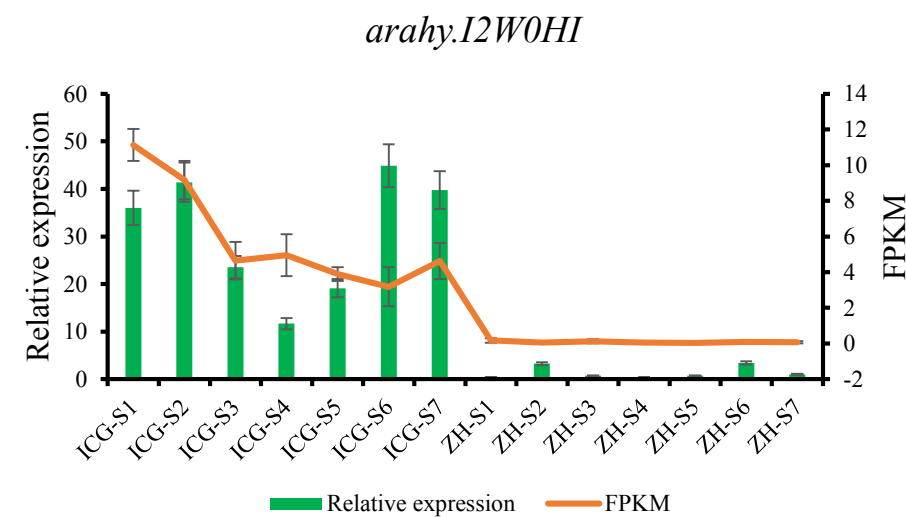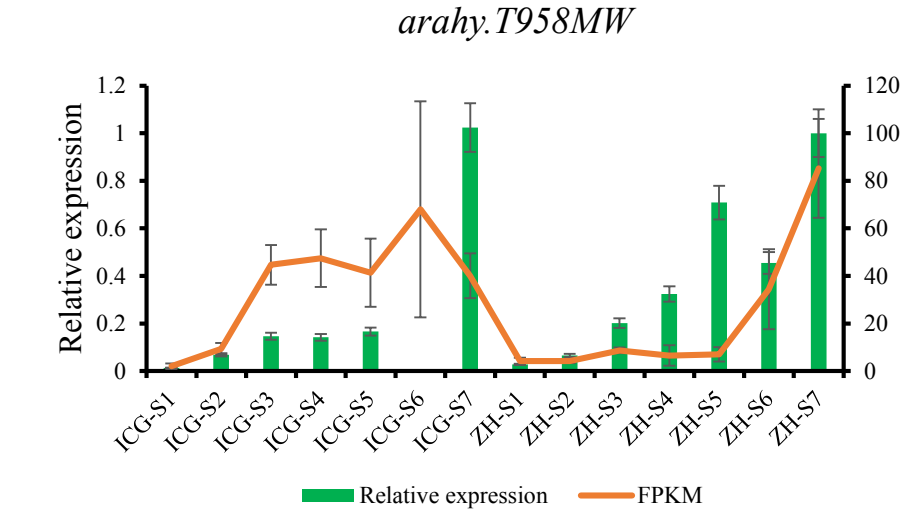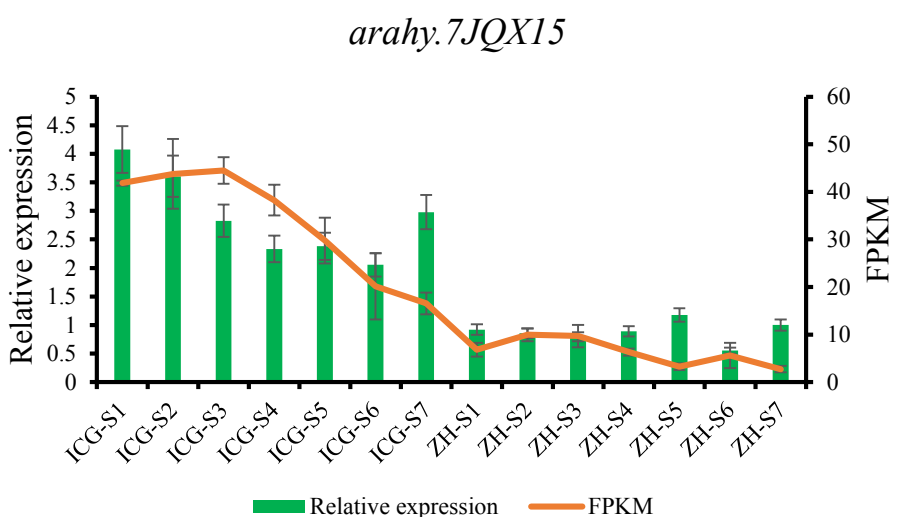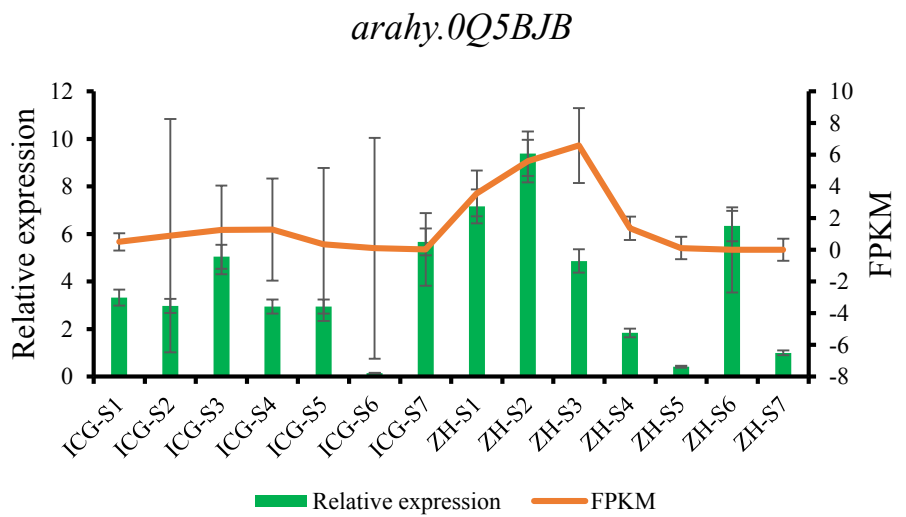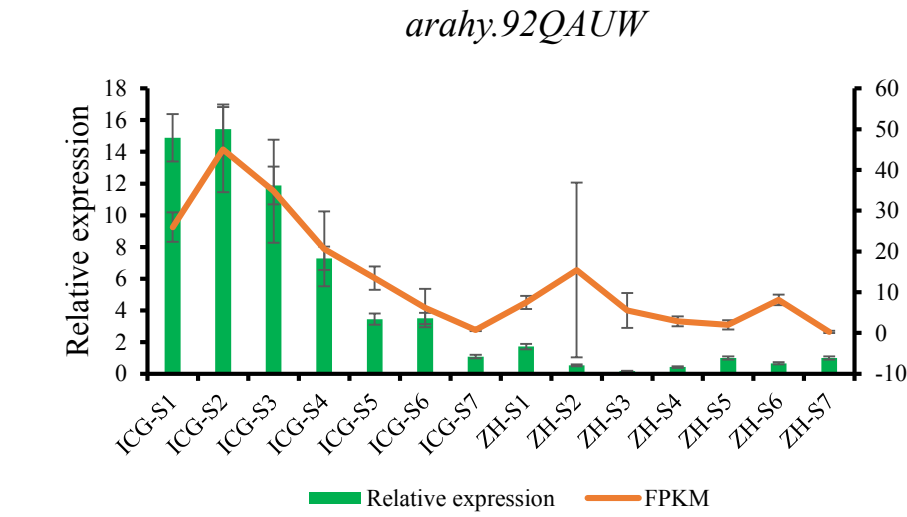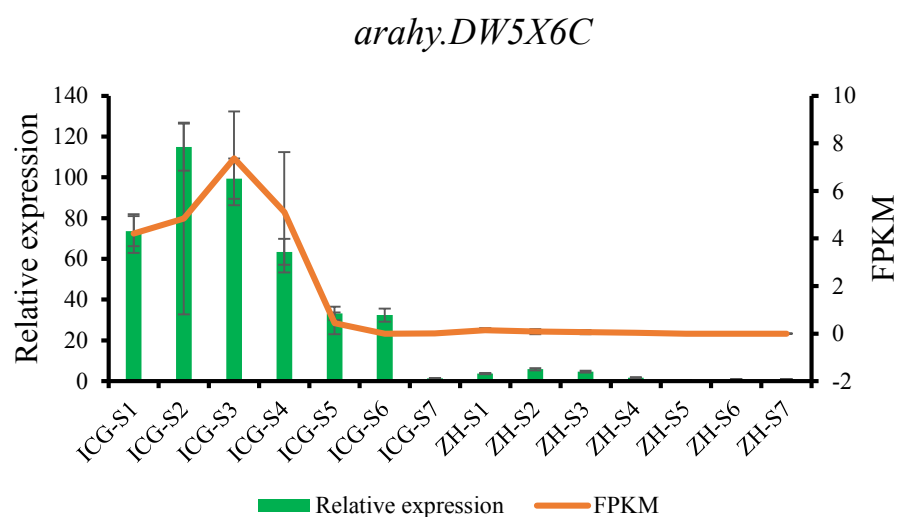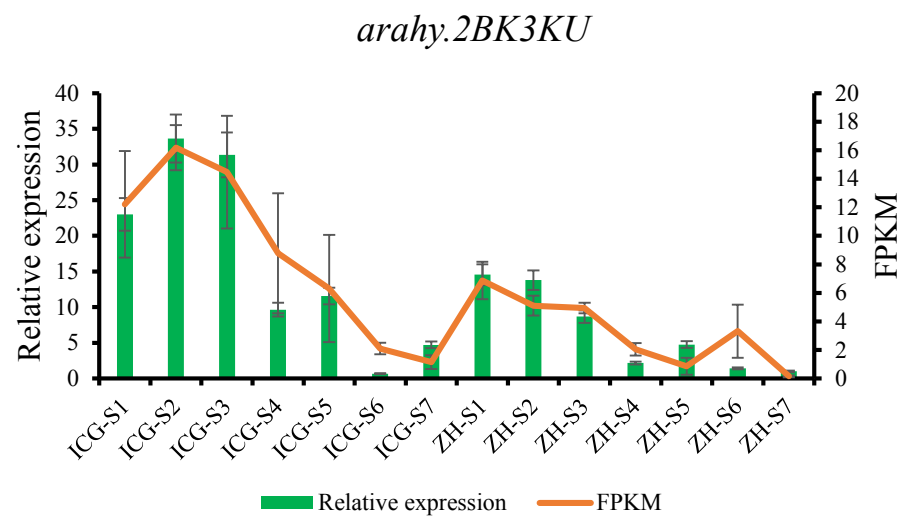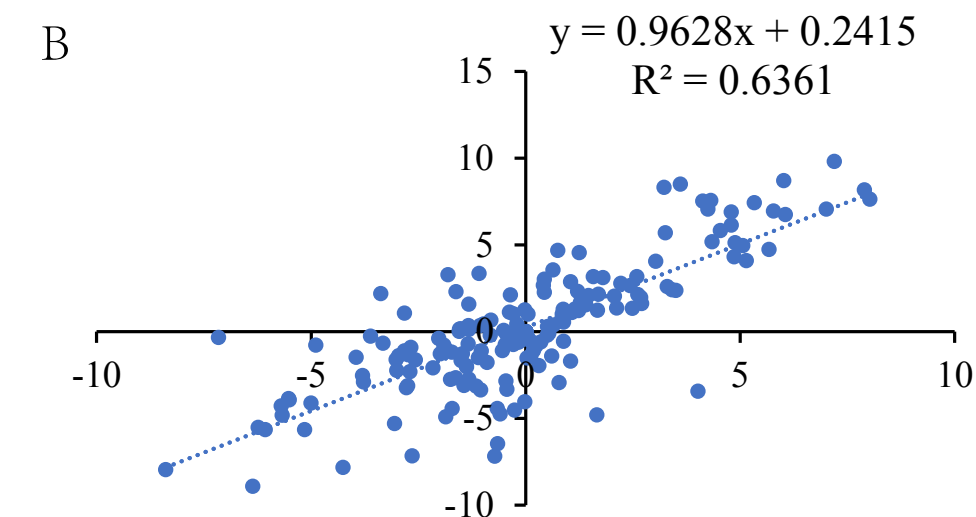

Supplement: s1 [file s1]

A

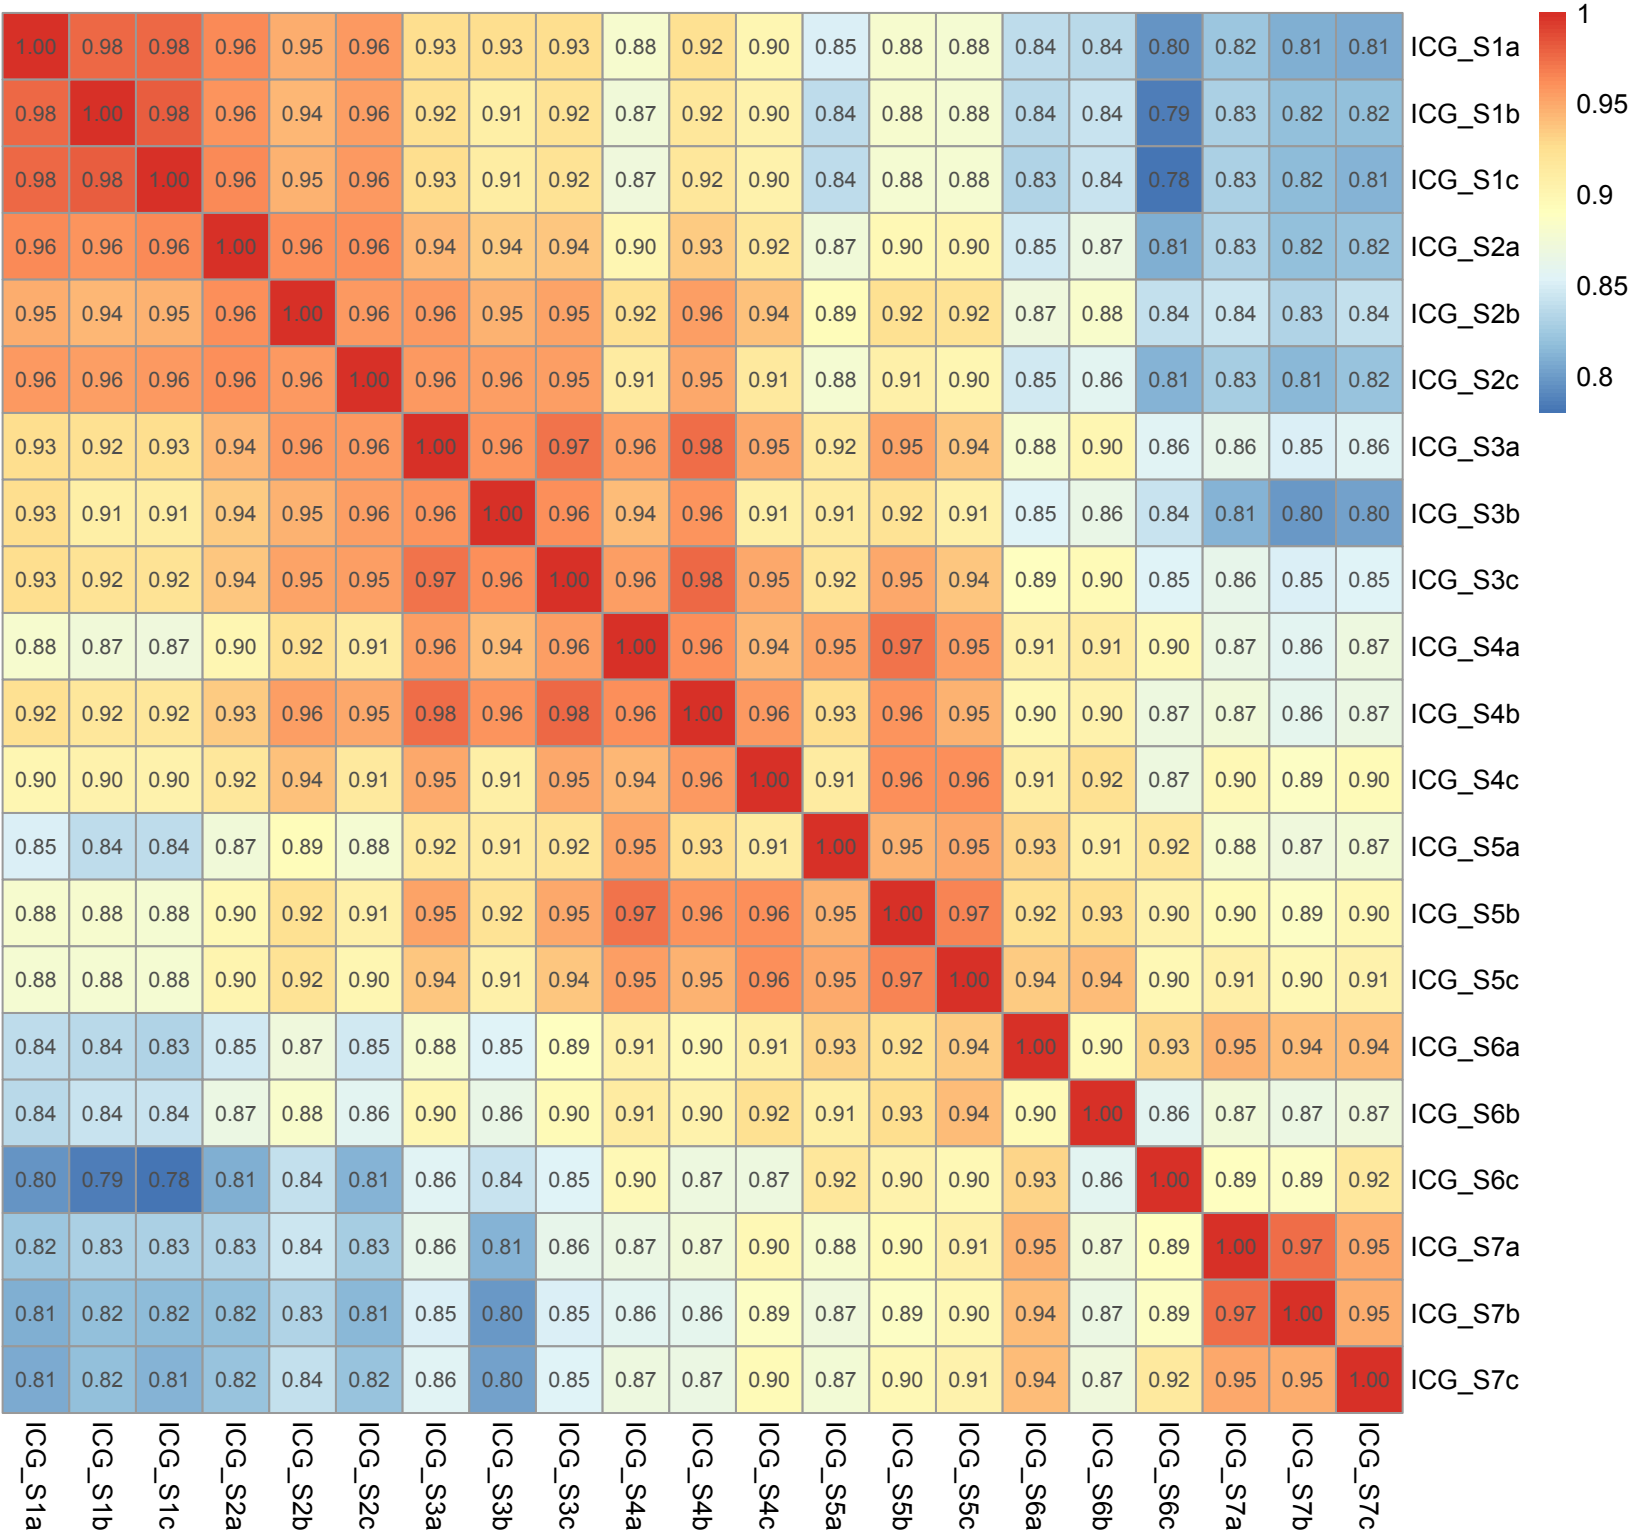

B

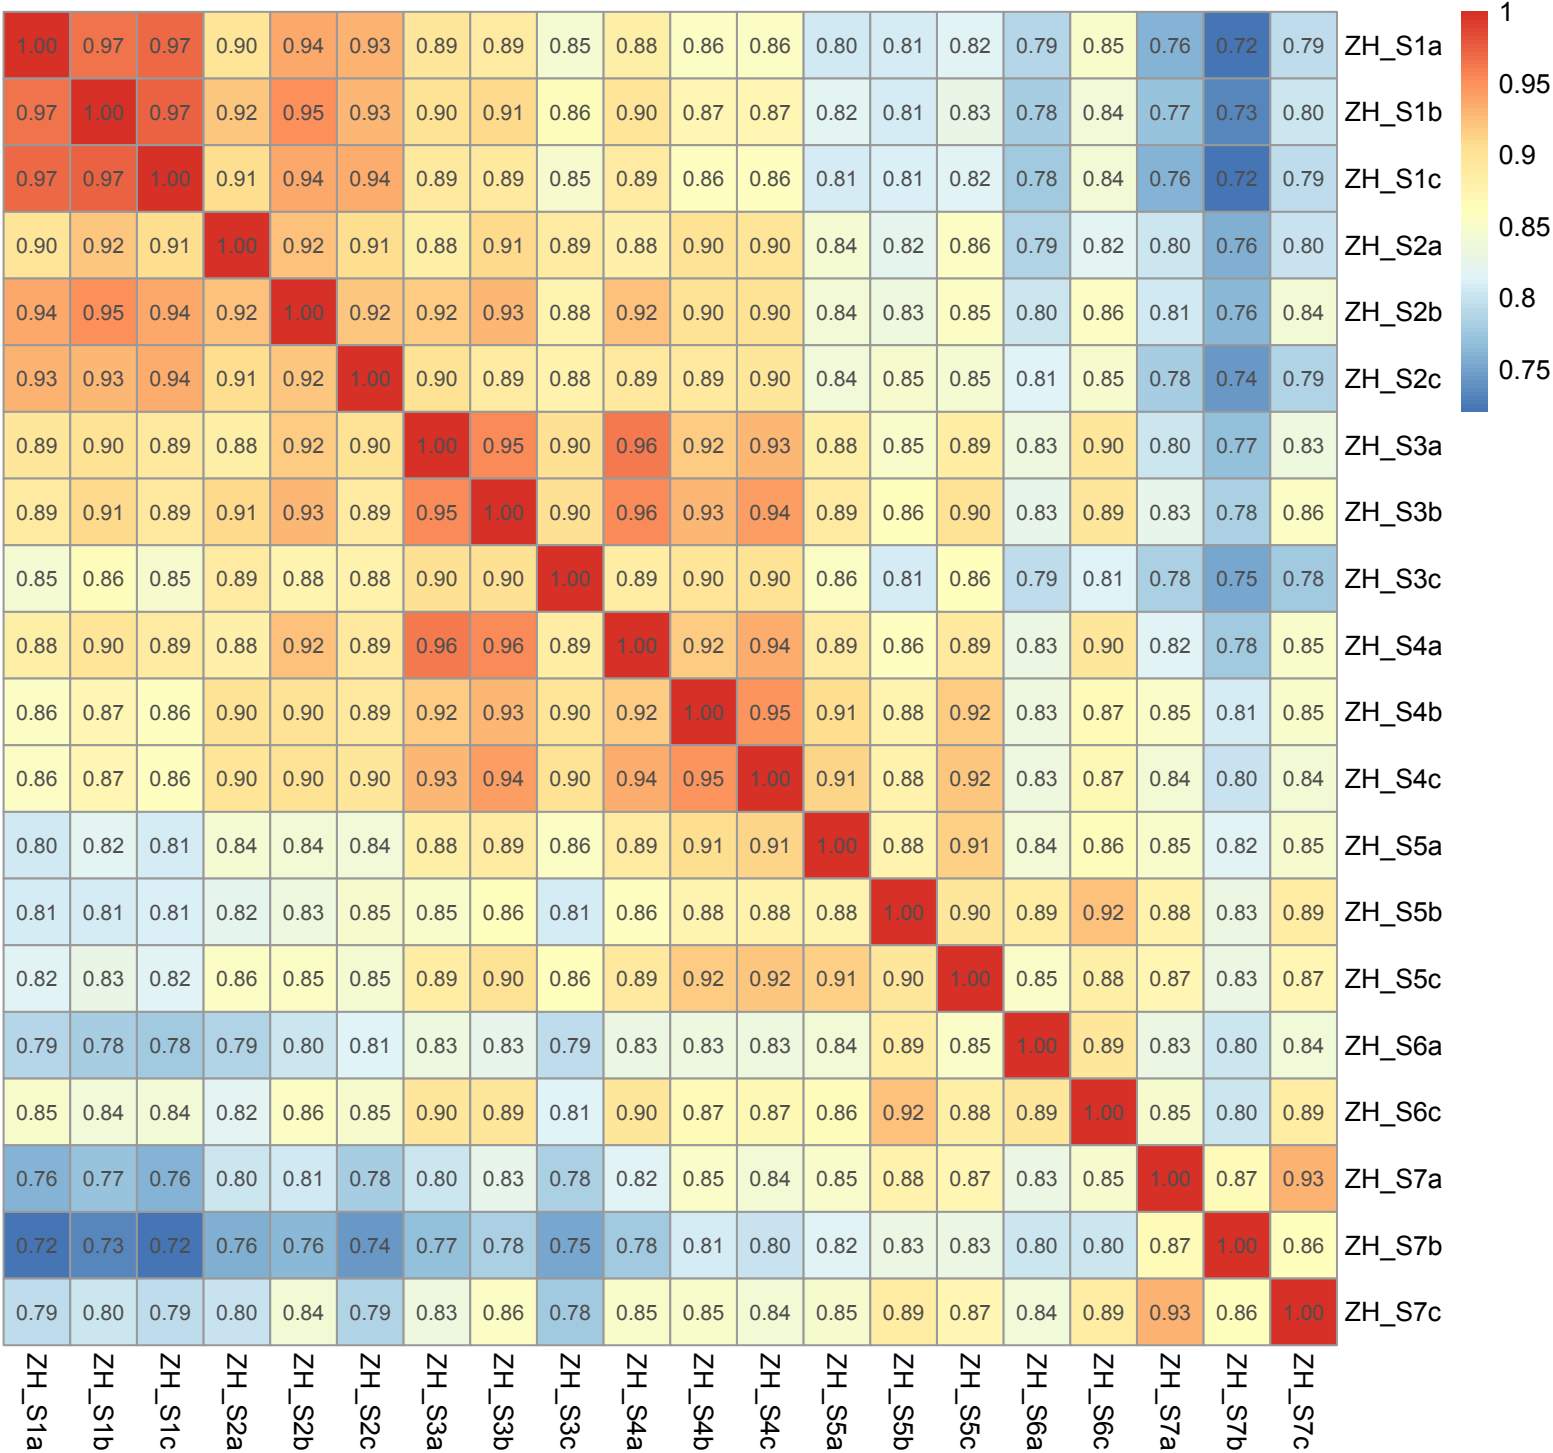

Supplement: s1 [file s1]
